# Supplementary material for: Middle-aged mice treated with GHK-Cu peptide administered intraperitoneally or intranasally show behavioral rescue but divergent hippocampal aging programs
Source: Research Square preprint supplement (doi:10.21203/rs.3.rs-9520102/v1), 2026-05-26

# Middle-aged mice treated with GHK-Cu peptide administered intraperitoneally or intranasally show behavioral rescue but divergent hippocampal aging programs

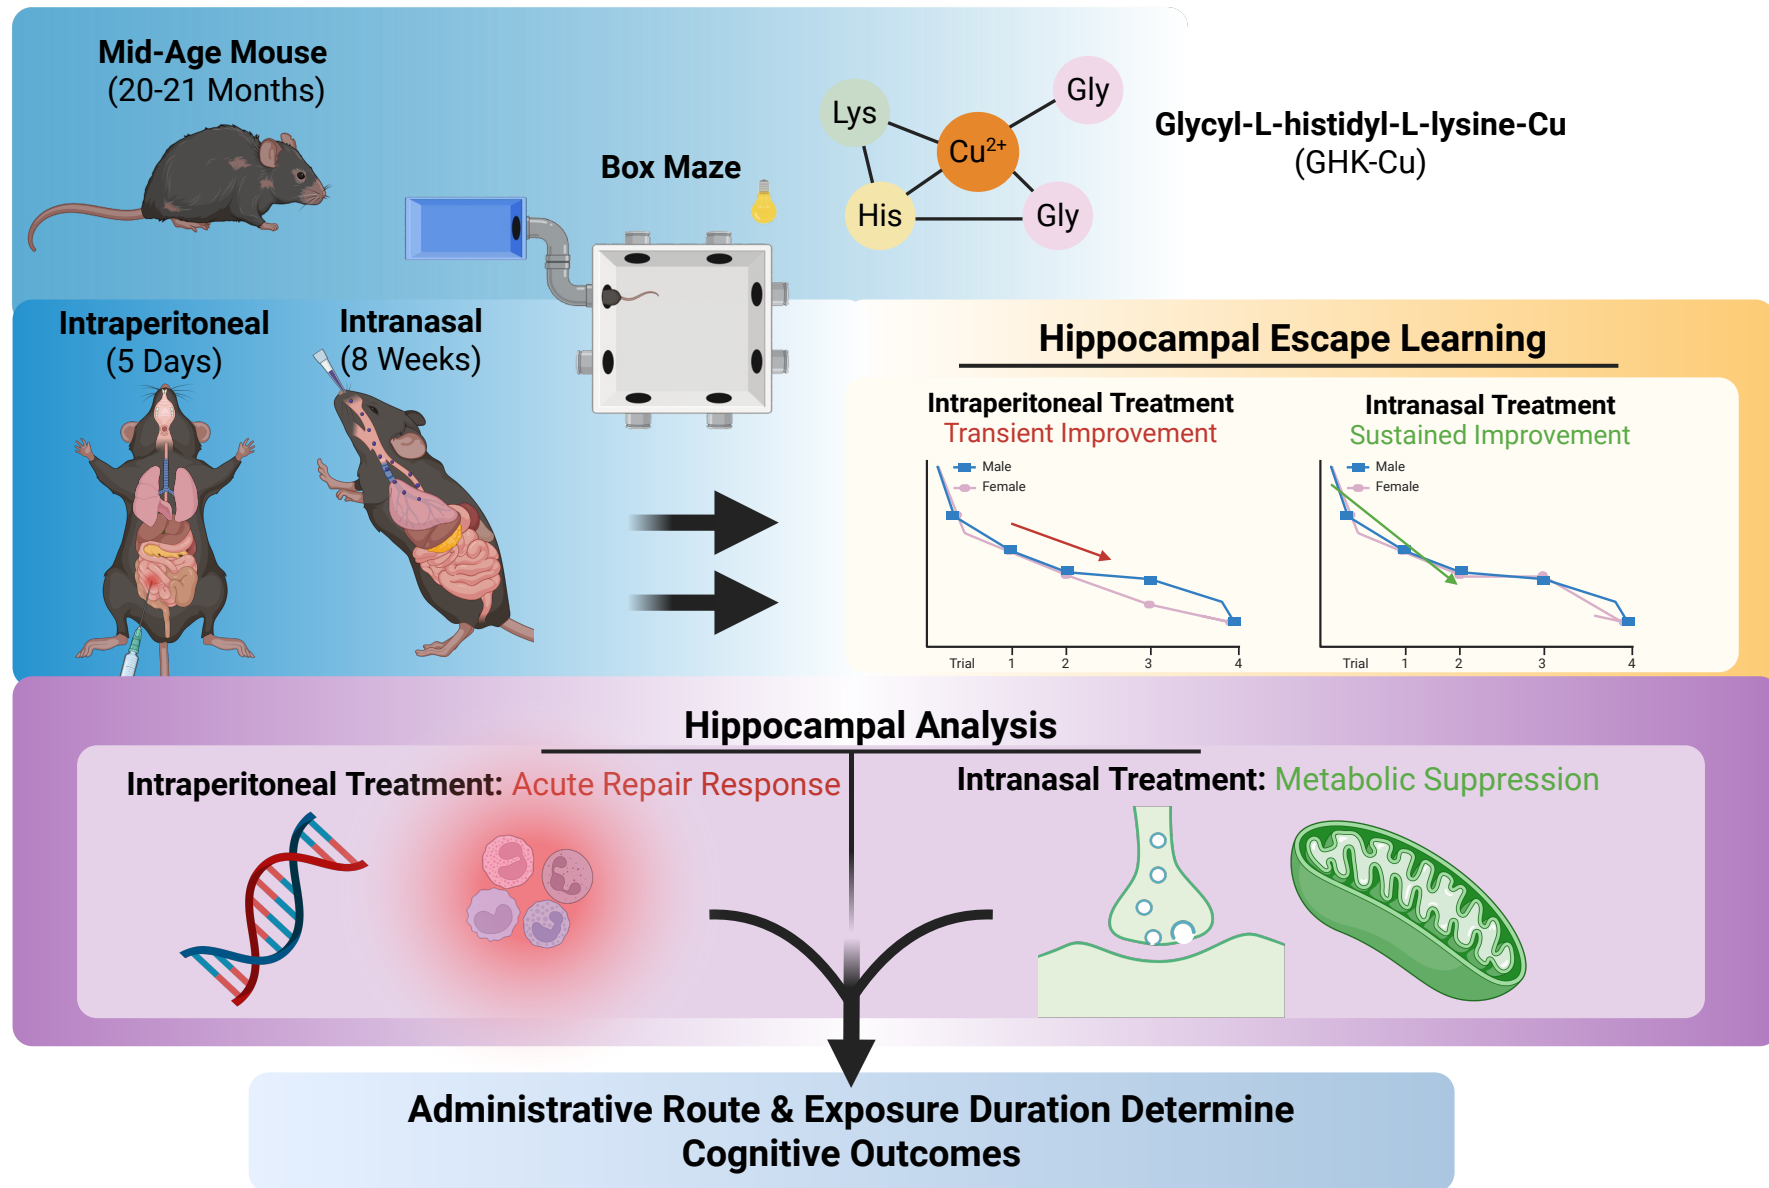

Supplement: Supplementary file 1 [file ca307a5c76d0996509006a92.pdf]
